# Supplementary material
Source: Springer Nature journal article supplement (https://www.springermedizin.de/resource/supplementary/13063_2013_1428_MOESM1_ESM.pdf/9620004)

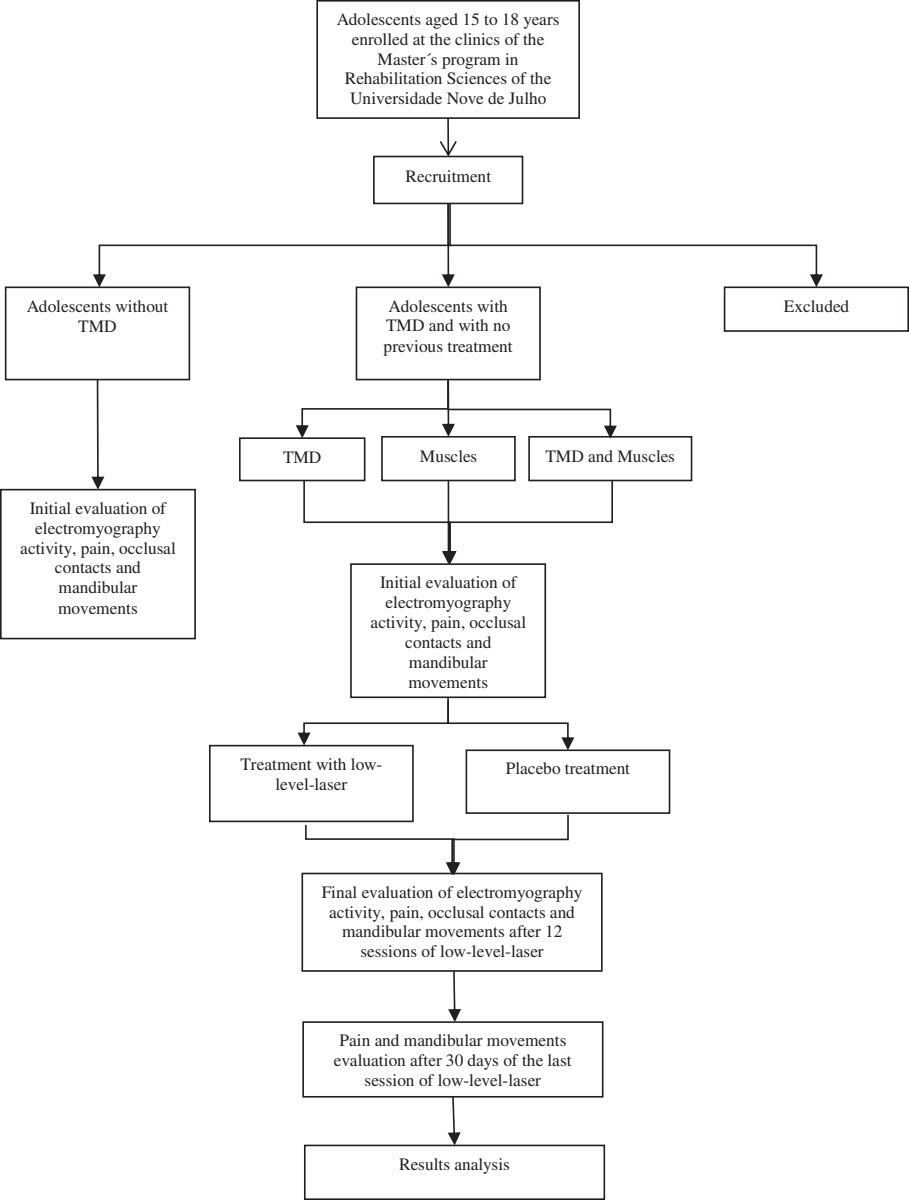

Supplement: MOESM1 [file 9620004]
